# Supplementary material for: Health promotion interventions to increase cervical cancer screening uptake in sub-Saharan Africa: a scoping review protocol
Source: Research Square preprint supplement (doi:10.21203/rs.3.rs-471201/v1), 2021-04-30
Supplement: Supplementary file 1 [file 3ce4c082df5c90f2b75dd492.docx]

**Characteristics of studies to be included**

| **Author/year** | **Country** | **Sample size** | **Study design** | **Interventions/control** | **Outcome** | **Follow-up** | **Findings** |
| --- | --- | --- | --- | --- | --- | --- | --- |
|  |  |  |  |  |  |  |  |
|  |  |  |  |  |  |  |  |
|  |  |  |  |  |  |  |  |
|  |  |  |  |  |  |  |  |
|  |  |  |  |  |  |  |  |
|  |  |  |  |  |  |  |  |
